# Supplementary material
Source: ML conference proceedings conference paper supplement (https://openaccess.thecvf.com/content/ACCV2020/html/Zhang_Few-Shot_Object_Detection_ACCV_2020_paper.html)
Supplement: Supplementary file 1 [file Zhang_Few-Shot_Object_Detection_ACCV_2020_supplemental.pdf]

# Few-Shot Object Detection by Second-order Pooling (Supplementary Material)

Shan Zhang<sup>1</sup>, Dawei Luo<sup>2</sup>, Lei Wang<sup>3</sup>, Piotr Koniusz<sup>4,1</sup>(✉)

<sup>1</sup> Australian National University

<sup>2</sup> Beijing University of Posts and Telecommunications

<sup>3</sup> University of Wollongong

<sup>4</sup> Data61/CSIRO

**Power Normalization in Similarity Learning.** Relation descriptors between query-support matrices  $\mathbf{M}^*$  and  $\mathbf{M}$  are formed by concatenation of  $\mathbf{M}^*$  with  $\mathbf{M}$  along the channel mode *e.g.*  $\text{cat}(\mathbf{M}^*, \mathbf{M}) \in \mathbb{R}^{2 \times K \times K}$  with the goal of similarity learning by SN. We also note that  $\mathbf{M}$  may be obtained by for instance the mean between  $\mathbf{M}^1, \dots, \mathbf{M}^Z$  belonging to the same episode and class ( $Z > 1$  for few-shot case).

It is known from [1] that the Power Normalization in Eq. (1) (the main submission) performs a co-occurrence detection rather than counting. For classification problems, assume a probability mass function  $p_{X_{ij}}(x) = 1/(N+1)$  if  $x = 0, \dots, N$ ,  $p_{X_{ij}}(x) = 0$  otherwise, that tells the probability that co-occurrence between  $\Phi_{in}$  and  $\Phi_{jn}$  happened  $x = 0, \dots, N$  times in some chosen image region with  $N = WH$  feature vectors. Note that classification often depends on detecting a co-occurrence (*e.g.*, is there a flower co-occurring with a pot?) rather than counts (*e.g.*, how many flowers and pots co-occur?). Using second-order pooling without PN requires a classifier to observe  $N+1$  tr. samples of *flower and pot* occurring in quantities  $0, \dots, N$  to memorise all possible occurrence configurations. For relation learning, we stack pairs of samples to compare, thus a comparator now has to deal with a probability mass function of  $R_{ij} = X_{ij} + Y_{ij}$  depicting *flowers and pots* whose  $\text{support}(p_{R_{ij}}) = 2N+1 > \text{support}(p_{X_{ij}}) = N+1$  if random variable  $X = Y$  (same class). For  $Z$ -shot learning, the support equals  $(Z+1)N+1$  and the variance grows further indicating that the comparator has to memorize more configurations of co-occurrence  $(i, j)$  as  $Z$  grows.

However, this situation is alleviated by Power Normalization (the SigmE operator), whose probability mass function can be modeled as  $p_{X_{ij}^\eta}(x) = 1/2$  if  $x = \{0, 1\}$ ,  $p_{X_{ij}^\eta}(x) = 0$  otherwise, as PN detects a co-occurrence (or its lack). For  $Z$ -shot learning,  $\text{support}(p_{R_{ij}^\eta}) = Z+2 \ll \text{support}(p_{R_{ij}}) = (Z+1)N+1$ . The following ratio

$$\kappa = \frac{\text{support}(p_{R_{ij}})}{\text{support}(p_{R_{ij}^\eta})} = \frac{(Z+1)N+1}{Z+2} \quad (1)$$

shows that the comparator has to memorize many more configurations of co-occurrence  $(i, j)$  for naive pooling compared to PN as  $Z$  and/or  $N$  grow ( $N$  depends on the width and height  $H$  and  $W$  of a chosen region). Figure 1a shows the ratio of required memorization of no-PN case divided by the PN case (in

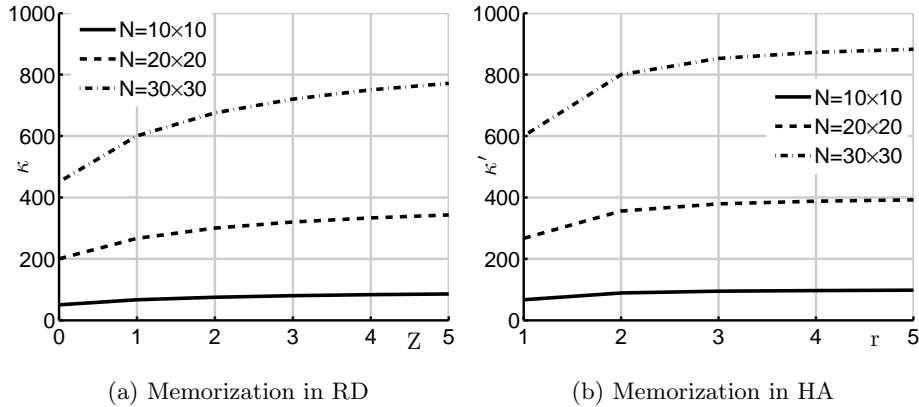

Fig. 1: Evaluations of the effect of PN on required memorization for Relationship Descriptors (RD) which in our case are a simple concatenation, and Hyper Attention (HR) in HARP.

similarity learning) as a function of  $Z$ -shot number given various region sizes  $N = WH$ . If  $Z=0$ , the case illustrates regular classification. Clearly, the effect of required memorization is exacerbated more in FSL than classification especially for larger  $Z \gg 1$ . For the PN-based variant, reduction in required memorization is equivalent of limiting the family of functions during similarity learning.

Our modeling assumptions are very basic *e.g.*, the assumption on mass functions with uniform probabilities, the use of the support of mass functions rather than variances to describe variability of co-occurrence  $(i, j)$ . Yet, substituting these modeling choices with more sophisticated ones does not affect theoretical conclusions that: (i) PN benefits few-shot learning ( $Z \geq 1$ ) more than the regular classification ( $Z=0$ ) in terms of reducing possible configurations of  $(i, j)$ , and (ii) for variable size regions (varying  $N$ ), PN reduces the number of configurations of  $(i, j)$  irrespective of value of  $N$  which is beneficial for forming relations between query-support ROIs of different sizes. While classifiers and comparators do not learn exhaustively all configurations of co-occurrence  $(i, j)$  as they have some generalization ability, they should learn quicker if the number of configurations of  $(i, j)$  is limited given the low-sample few-shot learning regime.

**Power Normalization in Hyper Attention RPN.** Firstly, let us explain the role of Second-order Self Correlation (SOSC) from Eq. (4) (the main submission) given by  $\mathbf{a}_{\text{SOSC+PN}} = \mathcal{G}_{\text{SigmE}}(\mathbf{M} \cdot \mathbf{1}/K; \eta)$ . Consider the effect of row-wise averaging:

$$\mathbf{M} \cdot \mathbf{1}/K = \frac{1}{NK} \sum_{n=1}^N \sum_{k=1}^K \phi_n \phi_{kn} = \frac{1}{N} \sum_{n=1}^N \phi_n \mu_n, \quad (2)$$

where  $\Phi = [\phi_1, \dots, \phi_N]$  and  $\mu_n = \sum_{k=1}^K \phi_{kn}$ . Eq. (2) captures correlation of each feature  $i$  in  $\phi_{in}$  with itself and other channels, as expressed by  $\mu_n$ . Thus, one

can think of Eq. (2) as capturing self-correlation of feature  $i$  together with its spread to other channels.

Below we show that not using PN in HARNP has a detrimental effect on learning in RPN due to larger number of feature variations which require more memorization capacity from network and thus a larger set of functions a classifier realizes. Increasing the set of functions while keeping the fixed number of training samples is a conceptually bad idea. Assume that each feature in the support and query maps of HARP can take a value in  $\{0, 1\}$  (to simplify assumptions). To describe the support feature  $i$  (spatial positions are factored out by the average pooling), let a probability mass function  $p_{X_i}(x) = 1/(N+1)$  if  $x = 0, \dots, N$ ,  $p_{X_i}(x) = 0$  otherwise, that tells the probability of co-occurrence between  $\Phi_{in}$  and  $(\Phi_{1n} + \dots + \Phi_{Kn})/K = \mu_n$ ,  $\forall n \in \{1, \dots, N\}$ . Note that we just assume here naively that  $\mu_n \in \{0, 1\}$  for simplicity. To describe the query feature  $i$  (at some spatial location), assume  $p_{Y_i}(x) = 1/2$  as  $x \in \{0, 1\}$ . Then, each spatial location in the cross-correlated attention map is described by a probability mass function of  $A_i = X_i \cdot Y_i$  which results in  $\text{support}(p_{A_i}) = \text{support}(p_{X_i}) = N+1$ .

However, using PN on Eq. (2) turns this equation into a feature detector with  $p_{X'_i}(x) = 1/2$  as  $x \in \{0, 1\}$  (co-occurrence detection or lack of it). Then, each spatial location in the cross-correlated attention map is described by a probability mass function of  $A'_i = X'_i \cdot Y_i$  which results in  $\text{support}(p_{A'_i}) = \text{support}(p_{X'_i}) = 1/2$ .

Finally, assume that the cross-correlated query against the support feature map is convolved with a filter of side size  $r$  which can take values in  $\{-1, 0, 1\}$  (also to simplify the argumentation) before being passed through a non-linearity (the form of an intermediate decision boundary) to take some intermediate decision regarding a region proposal. Each location of the filter can be described by  $p_{F_i}(x) = 1/3$  for  $x \in \{-1, 0, 1\}$  and  $\text{support}(p_{F_i}) = 1/3$ . Not surprisingly, a probability mass function of  $D_i = A_i + \sum_{i \in \mathcal{I}_{r,2}} F_i$  yields  $\text{support}(p_{D_i}) = 2Nr^2 + 1$  while for  $D'_i = A'_i + \sum_{i \in \mathcal{I}_{r,2}} F_i$ , we have  $\text{support}(p_{D'_i}) = 2r^2 + 1$ . The following ratio

$$\kappa' = \frac{\text{support}(p_{D_i})}{\text{support}(p_{D'_i})} = \frac{2Nr^2 + 1}{2r^2 + 1} \quad (3)$$

shows that the convolutional comparator with a filter of side size  $r$  has to memorize many more configurations if PN is not used by the Hyper Attention. Figure 1b shows the ratio of required memorization of no-PN case divided by the PN case (for RPN learning for a single convolution) as a function of filter side size  $r$  and support crop sizes  $N = WH$ . Clearly, the effect of required memorization is exacerbated for typical filter sizes  $r = 3$ . For the PN-based variant, reduction in the required memorization is equivalent of limiting the family of functions during learning region proposals which has a regularization effect on the learner.

Furthermore, to describe the support feature  $i$ , one may consider that each  $\mu_n$  in fact may have a probability mass function  $p_Z(x) = 1/(K+1)$  if  $x = 0, \dots, K$ ,  $p_Z(x) = 0$  otherwise. Therefore, the probability mass  $X''_i = X_i \cdot Z$  has  $\text{support}(p_{X''_i}) = NK + 1$  which is a more realistic modeling of set support for co-occurrence between  $\Phi_{in}$  and  $(\Phi_{1n} + \dots + \Phi_{Kn})/K = \mu_n$ ,  $\forall n \in \{1, \dots, N\}$ . Having  $A''_i = X''_i \cdot Y_i$  and  $D''_i = A''_i + \sum_{i \in \mathcal{I}_{r,2}} F_i$ , we get  $\text{support}(p_{D''_i}) = 2NKr^2 + 1$  which

yields the following ratio

$$\kappa'' = \frac{\text{support}(p_{D_i''})}{\text{support}(p_{D_i'})} = \frac{2NKr^2 + 1}{2r^2 + 1}, \quad (4)$$

which shows that as  $k \gg 1$ , not using PN in HARPn would result in even more need for memorization than Eq. (3) suggests.

**HARPn network/difference with ARPn.** HARPn/ARPn use RPN from the Faster R-CNN detector. As Fig. 3 and 4 (main paper) show, Hyper Attention uses our SOSD or SOSC to form attention-modified Query Feature Map (QFM). SOSC acts as ‘feature detector’ that also captures the feature spread between channels (operation **M·1**). ARPn uses average pooling—a mere ‘feature counter’ that increases learning uncertainty. Eq. (1) and (3) show that SOSC limits uncertainty of cross-correlating support against query, thus improving the quality of QFM and region proposals.

## References

1. Koniusz, P., Zhang, H., Porikli, F.: A deeper look at power normalizations. In: 2018 IEEE Conference on Computer Vision and Pattern Recognition, CVPR 2018, Salt Lake City, UT, USA, June 18-22, 2018, IEEE Computer Society (2018) 5774–5783
